# Supplementary material
Source: PubMed Central journal article supplement (PMC3014276)
Supplement: supp_mol.110.067702_Supplemental_Figure_2.pdf [file supp_mol.110.067702_Supplemental_Figure_2.pdf]

## Molecular Pharmacology

### Histone deacetylase inhibitors stimulate histone H3 lysine 4 methylation, in part, via transcriptional repression of histone H3 lysine 4 demethylases

Po-Hsien Huang, Chun-Han Chen, Chih-Chien Chou, Aaron M. Sargeant, Samuel K. Kulp, Che-Ming Teng, John C. Byrd, and Ching-Shih Chen

### Supplemental Figure 2

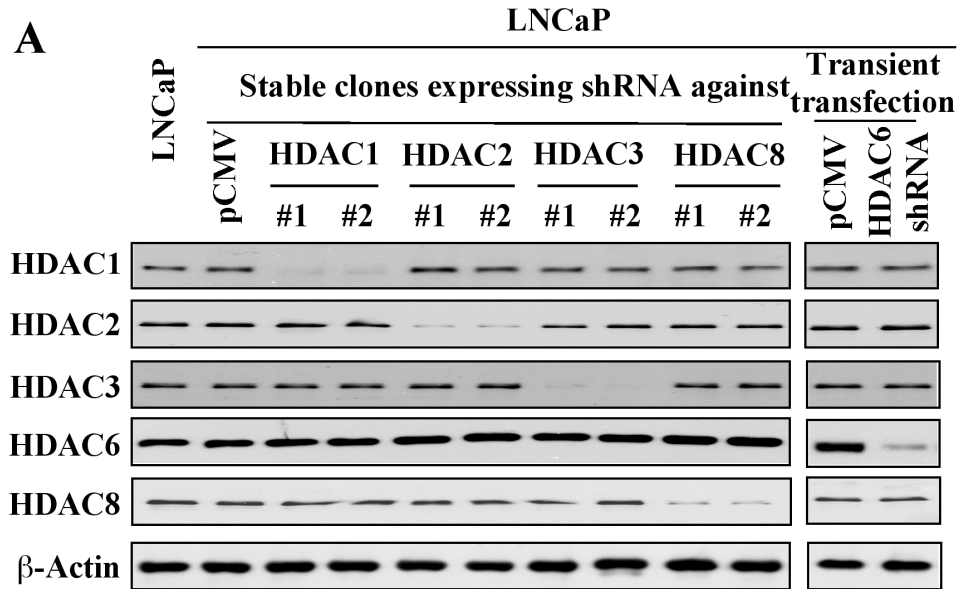

**Fig. S2.** Verification of shRNA-mediated knockdown of HDAC1, 2, 3, and 8 in the respective stable LNCaP subclones (#1, #2) as well as siRNA-mediated knockdown of HDAC6 in the transiently transfected LNCaP cells. These stable clones and transiently transfected cells were used to analyze the effects of silencing individual HDAC isozymes on H3K4 and H3K9 methylation status, and the expression levels of Sp1 and H3K4DMs, as illustrated in Fig. 6.
